# Supplementary material for: Linking Weather Regimes to the Variability of Warm-Season Tornado Activity over the United States
Source: Copernicus journal article supplement (doi:10.5194/egusphere-2024-3216), 2024-11-04
Supplement: Supplementary file 1 [file egusphere-2024-3216-supplement.pdf]

## Supplementary

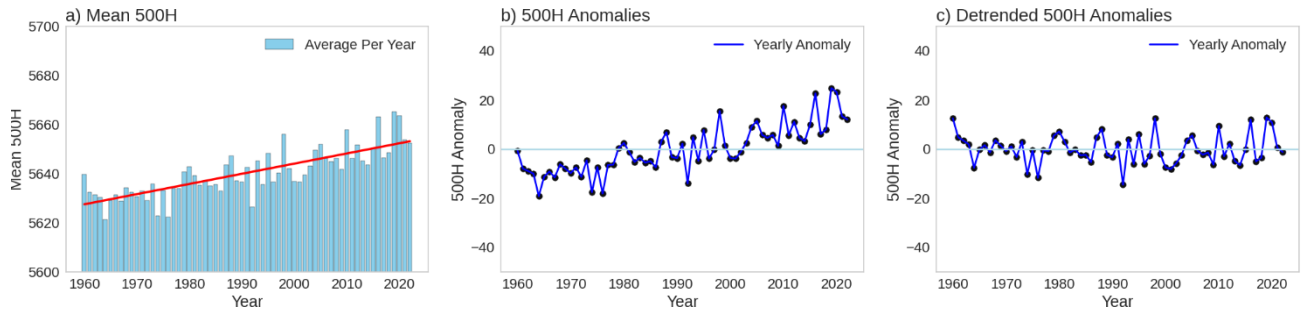

**Fig. S1:** Annual 500 hPa geopotential heights averaged over the warm-season (April-July) and Northern Hemisphere. a) Annual trend without considering the climatological mean; b) Annual anomalies over time with  $y = 0$  representing the mean; c) Detrended anomalies over time.

## Convective Precipitation Anomalies Persistent vs Nonpersistent

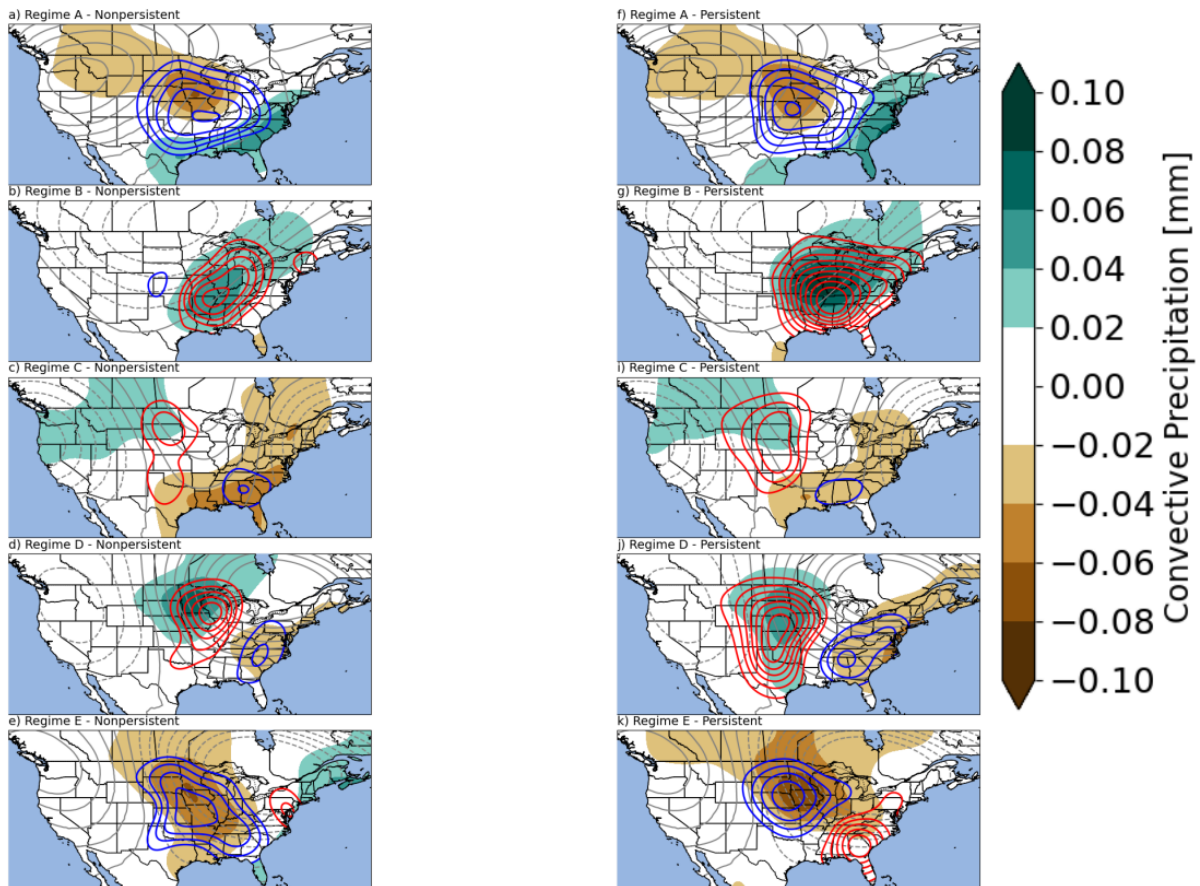

**Fig. S2:** Non-persistent (left column) and persistent (right column) composite anomalies of convective precipitation and TD probabilities.

| Regime | Total Nonpersistent WR Days | Nonpersistent WR Days with a TO | Total Persistent WR Days | Persistent WR Days with a TO |
|--------|-----------------------------|---------------------------------|--------------------------|------------------------------|
| A      | 486                         | 7                               | 1305                     | 22                           |
| B      | 479                         | 39                              | 1255                     | 120                          |
| C      | 463                         | 28                              | 1267                     | 68                           |
| D      | 385                         | 20                              | 1009                     | 70                           |
| E      | 224                         | 6                               | 813                      | 35                           |

**Table S1** Counts of total non-persistent and persistent WR days.

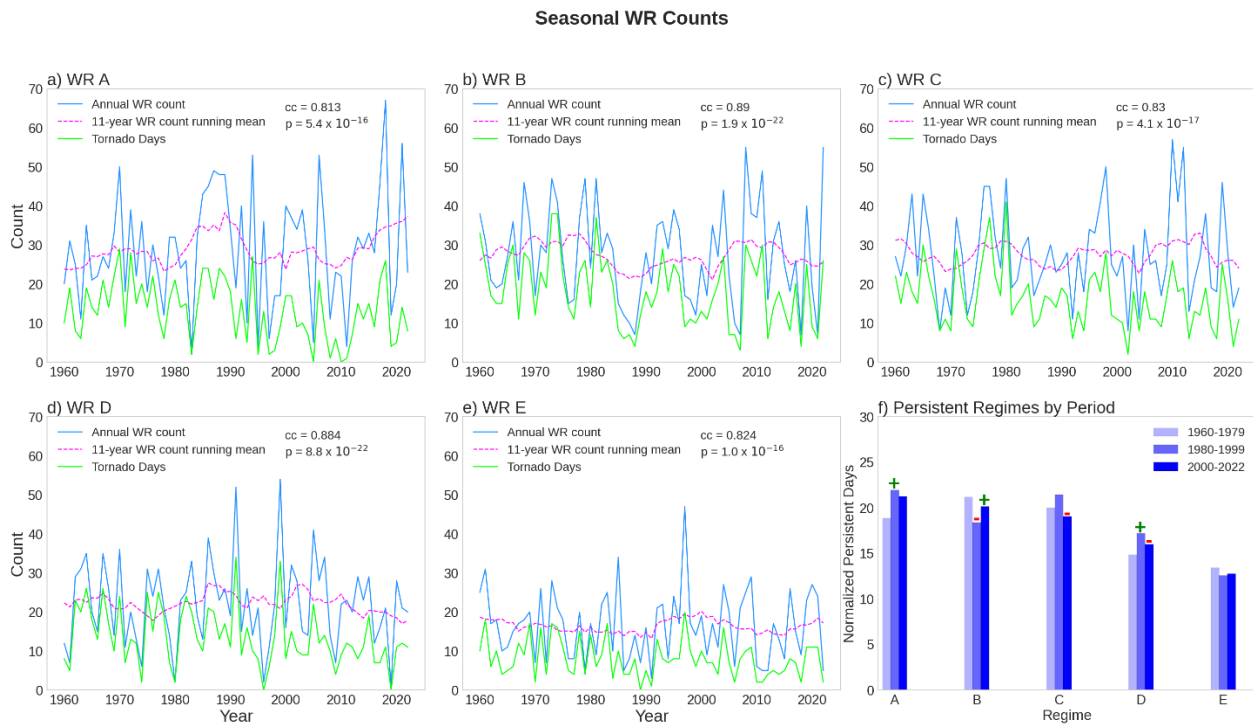

**Fig. S4:** a-e) Annual WR counts, 11-year WR count running mean, and WR TD time series with Pearson correlation coefficient and p-value between the annual WR count and WR TD time series; f) Persistent regime days per period normalized by number of years in each period. +’s and –’s indicate significant increases and decreases from the previous period, respectively, using Student’s t test ( $\geq 95\%$  confidence).

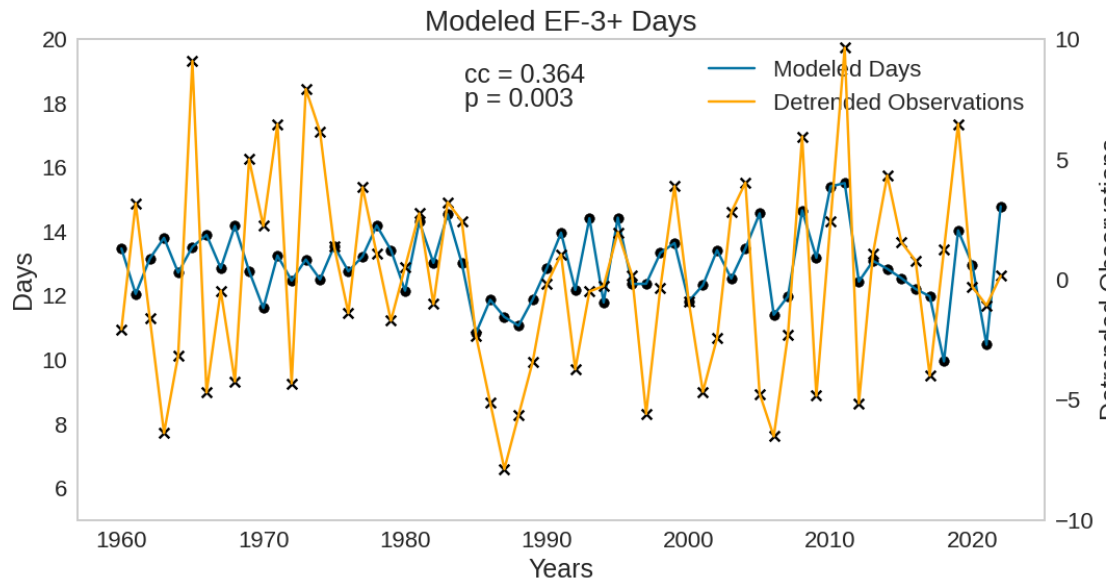

**Fig. S5:** The modeled EF-3+ days (blue) during 1960-2022 along with the detrended EF-3+ days from observation (yellow). The Spearman rank correlation coefficient (CC) and p-value of the two time series are also shown.-

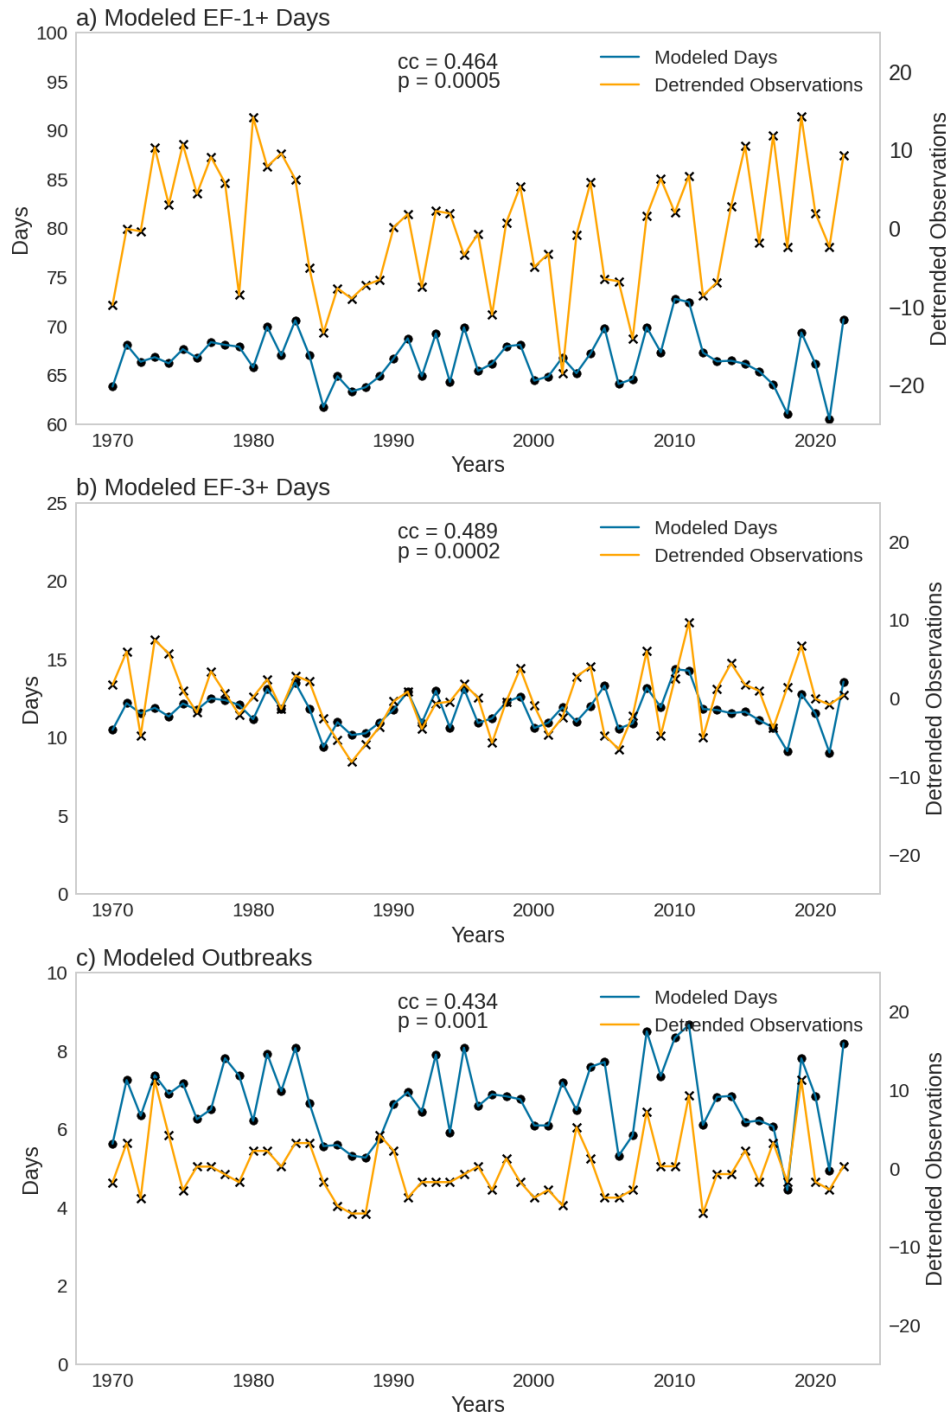

**Fig. S6:** The modeled (blue) and the observed (detrended, yellow) tornado indices during 1970-2022, along with the corresponding Spearman rank correlation coefficient (CC) and p-value.

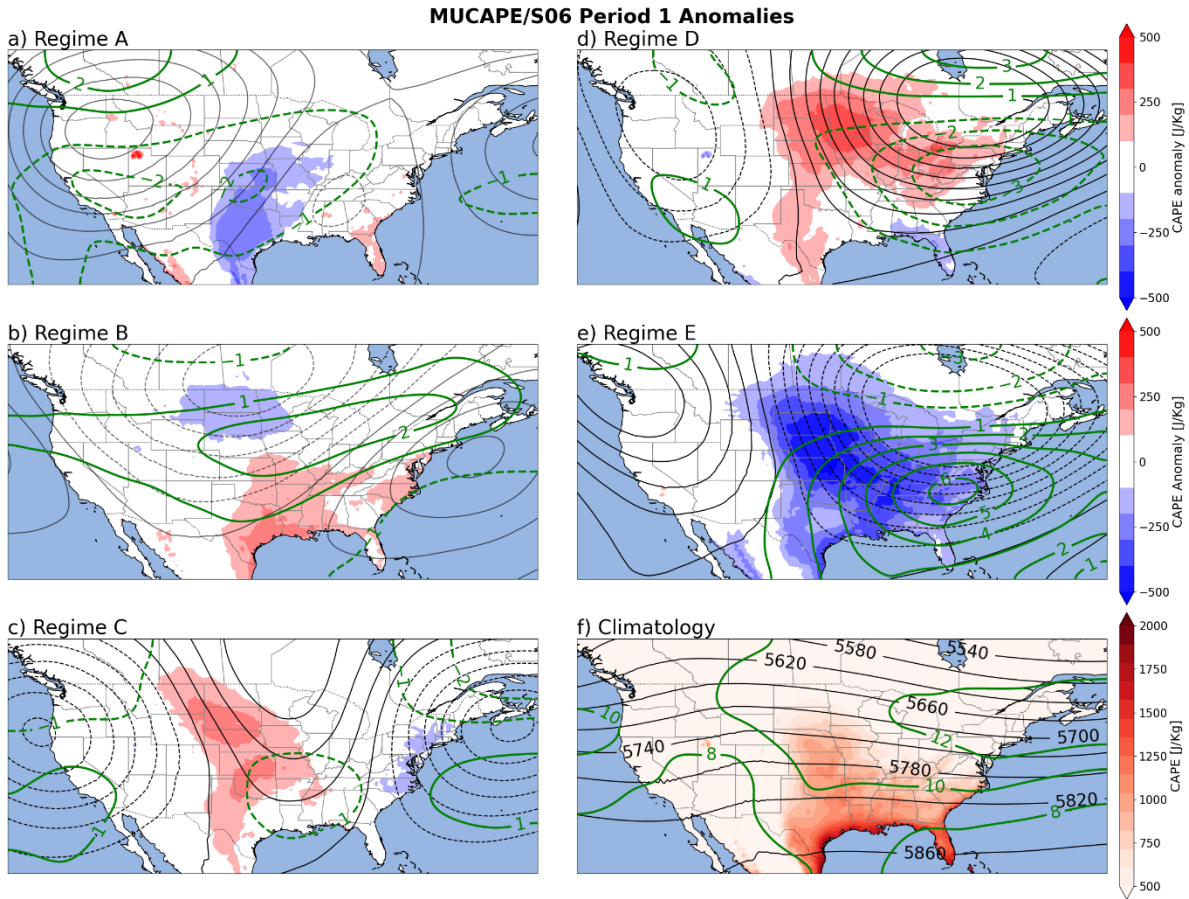

**Fig. S7:** Same as Fig. 1, but only for 1960-1979 (Climatology represents 1960-1979)

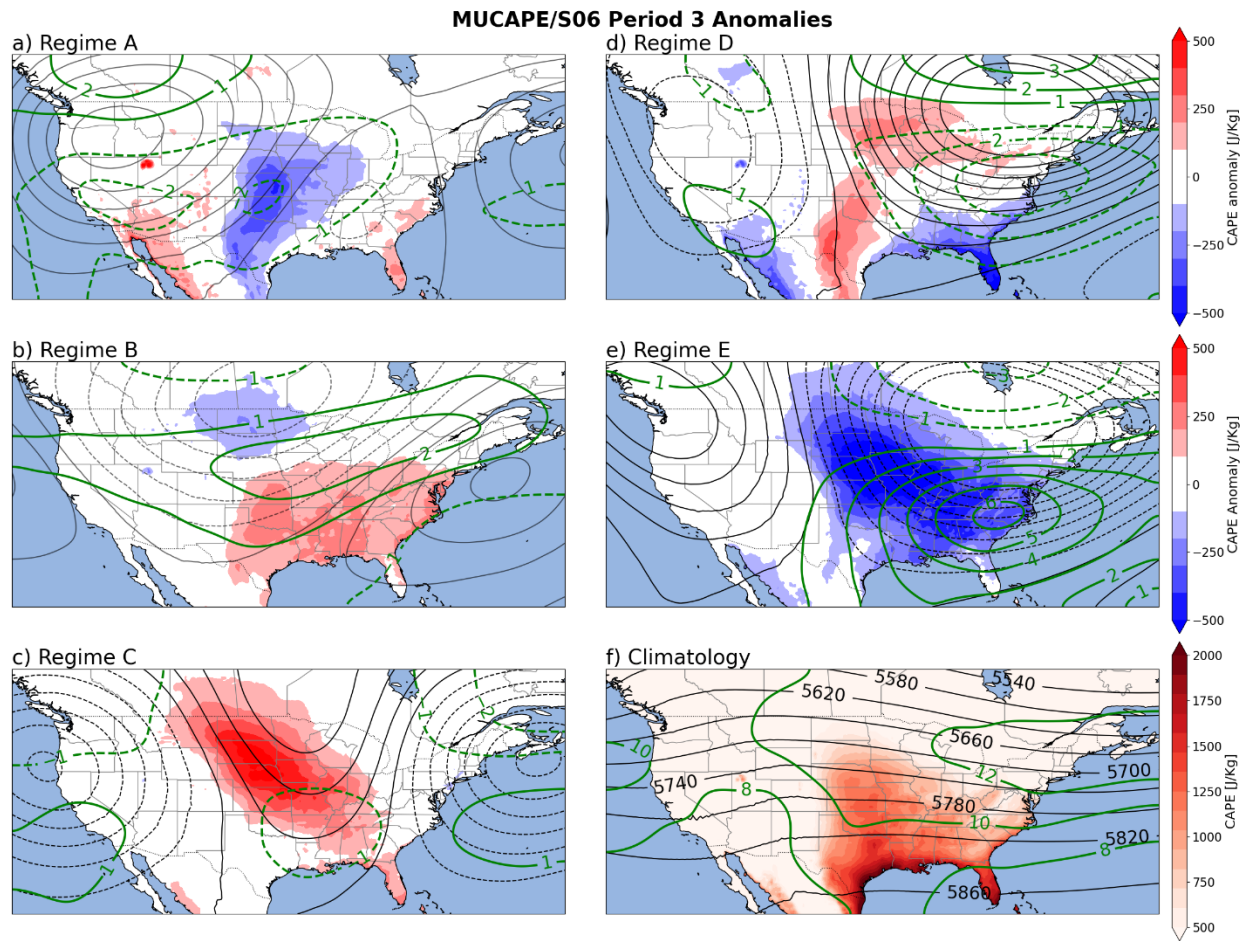

**Fig. S8:** Same as Fig. 1, but only for 2000-2022 (Climatology is for 2000-2022).
